# Supplementary material
Source: ML conference proceedings conference paper supplement (https://proceedings.mlr.press/v119/li20d.html)
Supplement: Supplementary file [file li20d-supp.pdf]

---

# PENNI: Pruned Kernel Sharing for Efficient CNN Inference

## Appendix

---

### 1. Visualization of coefficient matrix

The coefficient matrix is shown in Fig.1. By conducting retraining, pruning and fine-tuning process, both weight and structured redundancies are explored.

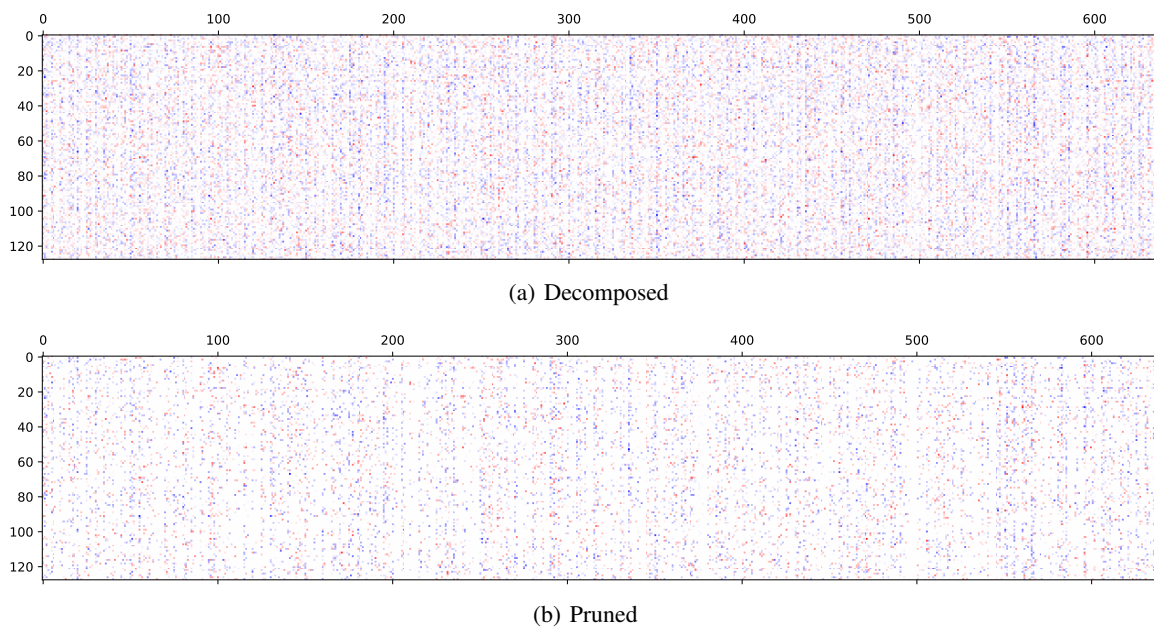

Figure 1. The visualization of the coefficient matrix. This is the third convolution layer of VGG16-CIFAR10 model with 128 input channels and 128 convolutional filters. The y-axis represents the output channels while the x-axis is the basis of each input channel.

To compare with the baseline model, we reconstruct the weight matrix by multiplying the coefficient matrix with the basis. The reconstructed weight matrix is shown in Fig.2. Although the sparsity is also shown in the reconstructed weight, more computation can be saved by using the decomposed convolution.

### 2. Pruned Model Structure

In this section, we list the detailed structure of the pruned model, including the number of basis kernels, the layer width before/after the shrinking process and the sparsity level of the coefficient matrix. We only consider the convolutional layers.

#### 2.1. VGG16 on CIFAR10

We list the detailed structure of the VGG16 before and after the shrinking process on Table.1. We only consider all the convolutional layers. The first index of the name represents the downsampling stage. The width represents the number of the filters (i.e., the number of output channels).

Supplementary Material for PENNI

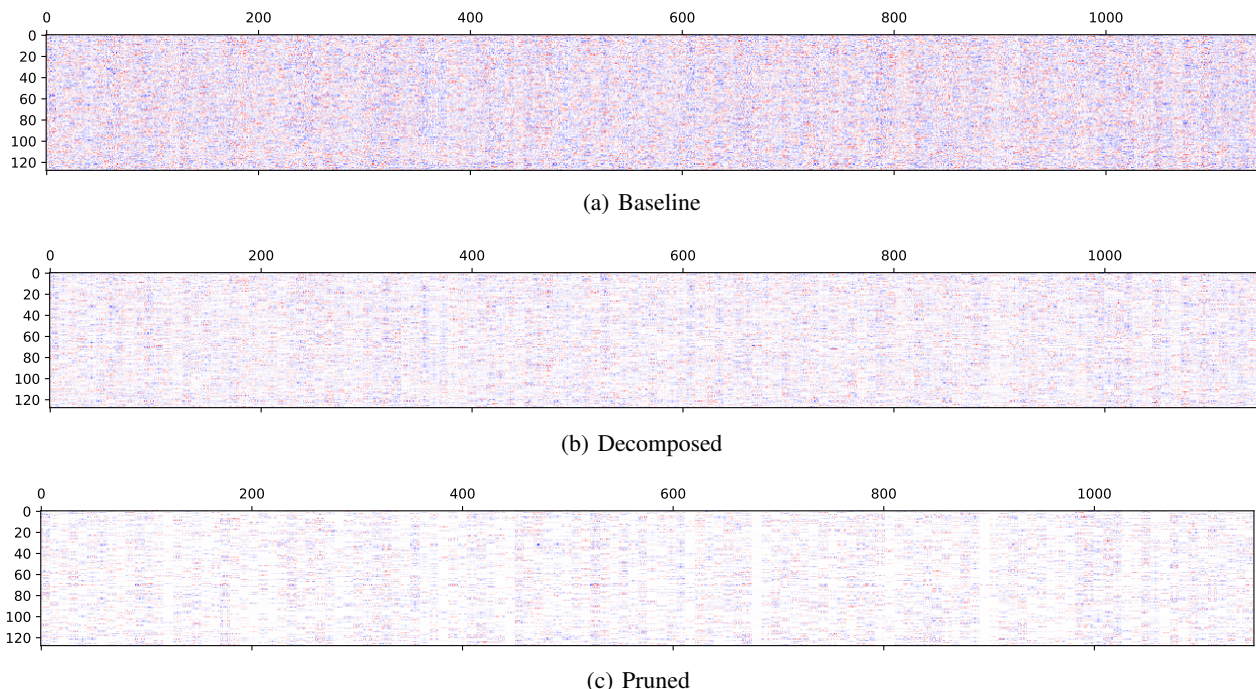

Figure 2. The visualization of the reconstructed weight matrix comparing with the baseline model. This is the third convolution layer of VGG16-CIFAR10 model with 128 input channels and 128 convolutional filters. The y-axis represents the output channels.

Table 1. Detailed Structure of VGG16-CIFAR10

| Name    | Size | Before shrinking |       |                                  |            | After shrinking |       |                                  |            |
|---------|------|------------------|-------|----------------------------------|------------|-----------------|-------|----------------------------------|------------|
|         |      | Width            | Basis | Coefficients<br>(Non-zero/Total) | Sparsity/% | Width           | basis | Coefficients<br>(Non-zero/Total) | Sparsity/% |
| conv1_1 | 3    | 64               | 5     | 196/960                          | 79.58      | 55              | 5     | 196/825                          | 76.24      |
| conv1_2 | 3    | 64               | 5     | 2313/20480                       | 88.71      | 64              | 5     | 2238/17600                       | 87.28      |
| conv2_1 | 3    | 128              | 5     | 5862/40960                       | 85.69      | 128             | 5     | 5862/40960                       | 85.68      |
| conv2_2 | 3    | 128              | 5     | 12052/81920                      | 85.29      | 128             | 5     | 12052/81920                      | 85.28      |
| conv3_1 | 3    | 256              | 5     | 23169/163840                     | 85.86      | 256             | 5     | 23169/163840                     | 85.85      |
| conv3_2 | 3    | 256              | 5     | 36870/327680                     | 88.75      | 256             | 5     | 36870/327680                     | 88.74      |
| conv3_3 | 3    | 256              | 5     | 27719/327680                     | 91.54      | 237             | 5     | 27716/303360                     | 90.86      |
| conv4_1 | 3    | 512              | 5     | 15688/65536                      | 97.61      | 158             | 5     | 15665/187230                     | 91.63      |
| conv4_2 | 3    | 512              | 5     | 4534/1310720                     | 99.65      | 62              | 5     | 4530/48980                       | 90.75      |
| conv4_3 | 3    | 512              | 5     | 2668/1310720                     | 99.79      | 48              | 5     | 2666/14880                       | 82.08      |
| conv5_1 | 3    | 512              | 5     | 1318/1310720                     | 99.89      | 36              | 5     | 1315/8640                        | 84.78      |
| conv5_2 | 3    | 512              | 5     | 874/1310720                      | 99.93      | 26              | 5     | 874/4680                         | 81.32      |
| conv5_3 | 3    | 512              | 5     | 2554/1310720                     | 99.80      | 486             | 5     | 2554/63180                       | 95.95      |
| Total   |      |                  |       | 135817/8172480                   | 98.34      |                 |       | 135707/1263775                   | 89.26      |

2.2. ResNet50 on ImageNet

We list the detailed structure of ResNet50-R1 after shrinking process in Table.2. We only consider all the convolutional layers including the  $1 \times 1$  convolution. 'L' represents the downsampling stages while the 'B' stands for the residual blocks. This table reveals that, although for some layer the reduction of the layer width is not significant, the model can still benefit from pruning basis kernels.

Supplementary Material for PENNI

Table 2: Detailed Structure of ResNet50 after the shrinking process.

| Name            | Size | width | # of basis | coefficients<br>(non-zero/total) | sparsity/% |
|-----------------|------|-------|------------|----------------------------------|------------|
| conv1           | 7    | 59    | 5          | 128/885                          | 85.53      |
| L1B1.conv1      | 1    | 22    | -          | 500/1289                         | 61.48      |
| L1B1.conv2      | 3    | 29    | 4          | 125/2552                         | 95.1       |
| L1B1.conv3      | 1    | 256   | -          | 2223/7424                        | 70.06      |
| L1B1.downsample | 1    | 256   | -          | 2589/15104                       | 82.86      |
| L1B2.conv1      | 1    | 32    | -          | 2636/8192                        | 67.82      |
| L1B2.conv2      | 3    | 34    | 5          | 349/5440                         | 93.58      |
| L1B2.conv3      | 1    | 256   | -          | 2301/8704                        | 73.56      |
| L1B3.conv1      | 1    | 31    | -          | 2978/7936                        | 62.47      |
| L1B3.conv2      | 3    | 63    | 5          | 807/9756                         | 91.74      |
| L1B3.conv3      | 1    | 256   | -          | 3395/16128                       | 78.95      |
| L2B1.conv1      | 1    | 88    | -          | 5973/22528                       | 73.49      |
| L2B1.conv2      | 3    | 115   | 3          | 581/30360                        | 98.09      |
| L2B1.conv3      | 1    | 512   | -          | 11939/58880                      | 79.72      |
| L2B1.downsample | 1    | 512   | -          | 23134/131072                     | 82.35      |
| L2B2.conv1      | 1    | 20    | -          | 3778/10240                       | 63.11      |
| L2B2.conv2      | 3    | 76    | 4          | 334/6080                         | 94.51      |
| L2B2.conv3      | 1    | 512   | -          | 8154/38912                       | 79.05      |
| L2B3.conv1      | 1    | 66    | -          | 9898/33792                       | 70.71      |
| L2B3.conv2      | 3    | 98    | 4          | 497/25872                        | 98.08      |
| L2B3.conv3      | 1    | 512   | -          | 10702/50176                      | 78.67      |
| L2B4.conv1      | 1    | 78    | -          | 12508/39936                      | 68.68      |
| L2B4.conv2      | 3    | 95    | 4          | 1006/29640                       | 96.61      |
| L2B4.conv3      | 1    | 512   | -          | 12680/48640                      | 73.93      |
| L3B1.conv1      | 1    | 240   | -          | 29283/122880                     | 76.17      |
| L3B1.conv2      | 3    | 229   | 2          | 712/100920                       | 99.35      |
| L3B1.conv3      | 1    | 1024  | -          | 57763/234496                     | 75.37      |
| L3B1.downsample | 1    | 1024  | -          | 117775/524288                    | 77.54      |
| L3B2.conv1      | 1    | 103   | -          | 29283/122880                     | 76.17      |
| L3B2.conv2      | 3    | 182   | 5          | 866/93730                        | 99.08      |
| L3B2.conv3      | 1    | 1024  | -          | 57763/234496                     | 75.37      |
| L3B3.conv1      | 1    | 94    | -          | 35956/96256                      | 62.65      |
| L3B3.conv2      | 3    | 180   | 5          | 1222/84600                       | 98.56      |
| L3B3.conv3      | 1    | 1024  | -          | 53268/184320                     | 71.1       |
| L3B4.conv1      | 1    | 135   | -          | 49843/138240                     | 63.94      |
| L3B4.conv2      | 3    | 193   | 5          | 925/130275                       | 99.29      |
| L3B4.conv3      | 1    | 1024  | -          | 58240/197632                     | 70.53      |
| L3B5.conv1      | 1    | 155   | -          | 56279/158720                     | 64.54      |
| L3B5.conv2      | 3    | 197   | 4          | 1138/122140                      | 99.07      |
| L3B5.conv3      | 1    | 1024  | -          | 60387/201728                     | 70.07      |
| L3B6.conv1      | 1    | 206   | -          | 65496/210944                     | 68.95      |
| L3B6.conv2      | 3    | 217   | 4          | 1156/178808                      | 99.35      |
| L3B6.conv3      | 1    | 2024  | -          | 65842/222208                     | 70.37      |
| L4B1.conv1      | 1    | 495   | -          | 148203/506880                    | 70.76      |
| L4B1.conv2      | 3    | 484   | 1          | 546/239580                       | 99.77      |
| L4B1.conv3      | 1    | 2048  | -          | 279619/991232                    | 91.79      |
| L4B1.downsample | 1    | 2048  | -          | 580155/2097152                   | 72.34      |
| L4B2.conv1      | 1    | 411   | -          | 276731/841728                    | 67.12      |

Table 2 continued from previous page

| Nam        | Size | width | # of basis | coefficients<br>(non-zero/total) | sparsity/% |
|------------|------|-------|------------|----------------------------------|------------|
| L4B2.conv2 | 3    | 445   | 4          | 1334/731580                      | 99.82      |
| L4B2.conv3 | 1    | 2048  | -          | 275688/911360                    | 69.75      |
| L4B3.conv1 | 1    | 501   | -          | 307600/1026048                   | 70.02      |
| L4B3.conv2 | 3    | 484   | 3          | 1076/727452                      | 99.85      |
| L4B3.conv3 | 1    | 2048  | -          | 245290/991232                    | 75.25      |
| total      |      |       |            | 2.98M/12.98M                     | 77.0       |

### 3. Learning Curves

We show the learning curve of both the retraining and fine-tuning phase of the ResNet-50 model on ImageNet dataset. The curve here belongs to the ‘R4’ setting, which is  $d = 6$  and regularization strength  $\lambda = 5e - 5$

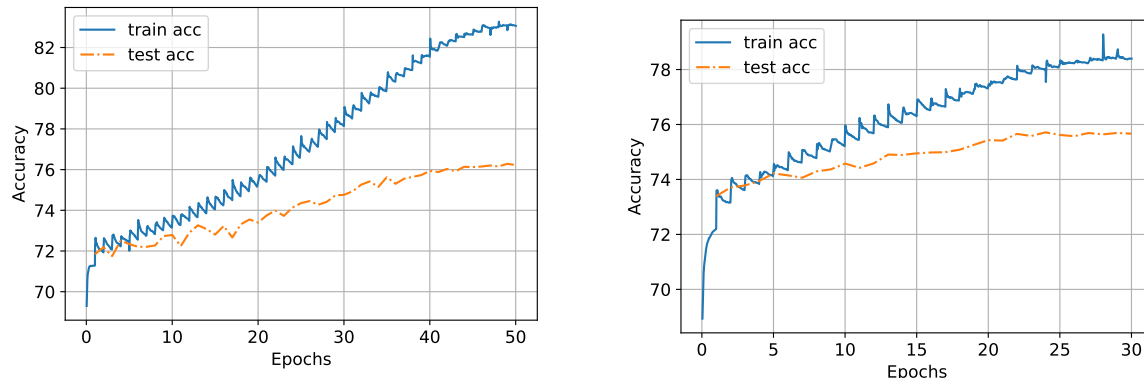

Figure 3. The learning curve of the (left) retraining phase and (right) fine-tuning phase. The model is ResNet-50 with parameter setting R4.
